# Supplementary material for: Enhancement of photocatalytic decomposition of perfluorooctanoic acid on CeO2/In2O3
Source: Royal Society of Chemistry journal article supplement (doi:10.1039/c6ra09856h), 2016-01-01

**Enhancement of photocatalytic decomposition of perfluorooctanoic acid on  
CeO<sub>2</sub>/In<sub>2</sub>O<sub>3</sub>**

Fang Jiang<sup>a</sup>, Haitao Zhao<sup>a</sup>, Huan Chen<sup>a,\*</sup>, Chenmin Xu<sup>a</sup>, Jian Chen<sup>b</sup>

<sup>a</sup> *Key Laboratory of Jiangsu Province for Chemical Pollution Control and Resources Reuse,  
School of Environmental and Biological Engineering, Nanjing University of Science and  
Technology, Nanjing 210094, China.*

<sup>b</sup> *Yancheng Teachers College, Jiangsu Provincial Key Laboratory of Coastal Wetland  
Bioresources and Environmental Protection, Yancheng 224002, PR China*

\*Corresponding author. Tel: +86-25-84303209; Fax: +86-25-84315352.

E-mail: hchen404@njust.edu.cn (H. Chen)

Fig. S1 Chemical structural formula of PFOA

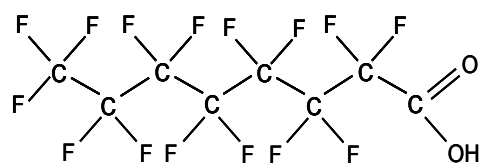

(PFOA)

Fig. S2 XRD patterns of 0.86% CeO<sub>2</sub>/In<sub>2</sub>O<sub>3</sub> sample, In<sub>2</sub>O<sub>3</sub> before calcination at 600 °C and after the calcination at 600 °C.

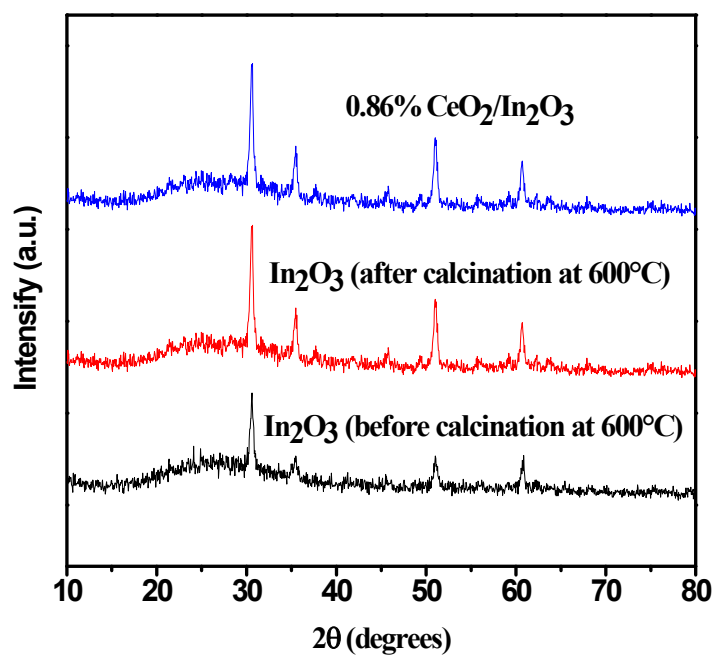

Fig. S3 The control experiment without light irradiation.

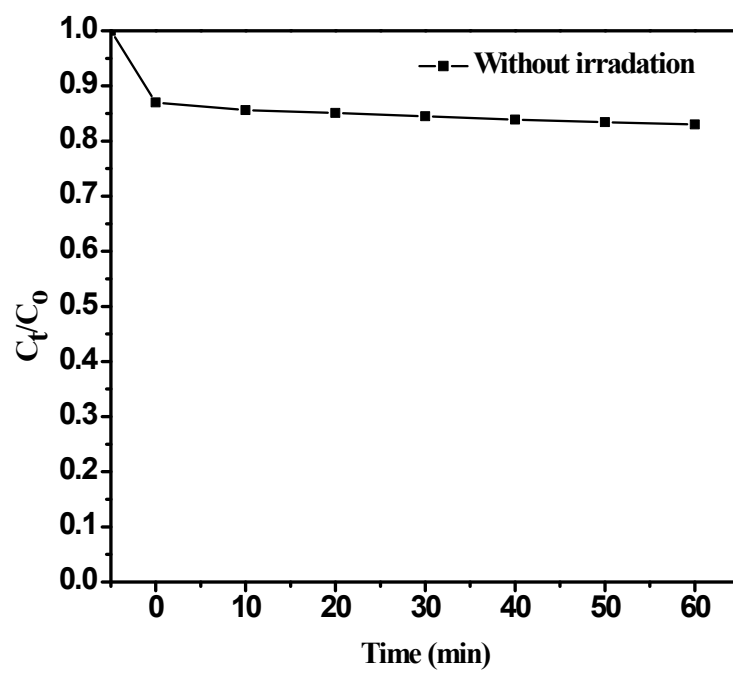

Fig. S4 (a) The defluorination curve and (b) TOC removal rate of perfluorooctanoic acid (PFOA) over 0.86% CeO<sub>2</sub>/In<sub>2</sub>O<sub>3</sub>.

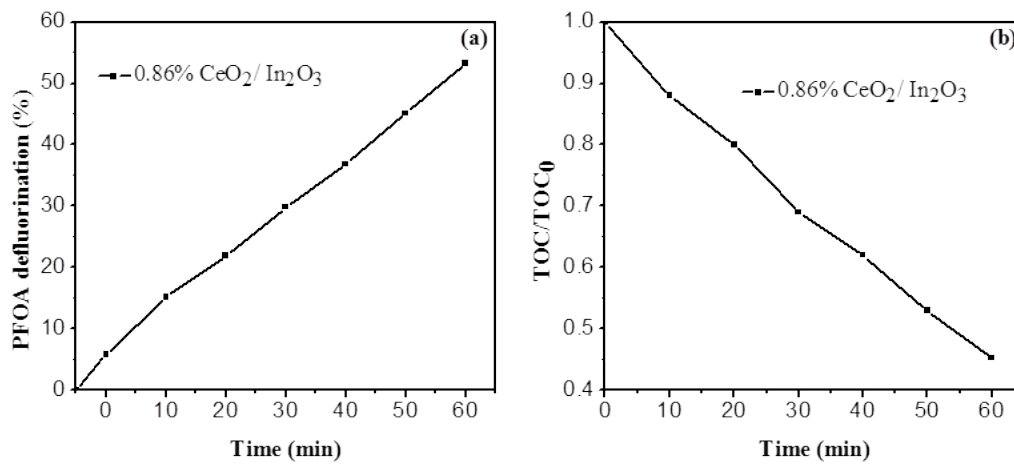

Fig. S5 The XRD patterns of the 0.86% CeO<sub>2</sub>/In<sub>2</sub>O<sub>3</sub> sample before and after the photocatalysis.

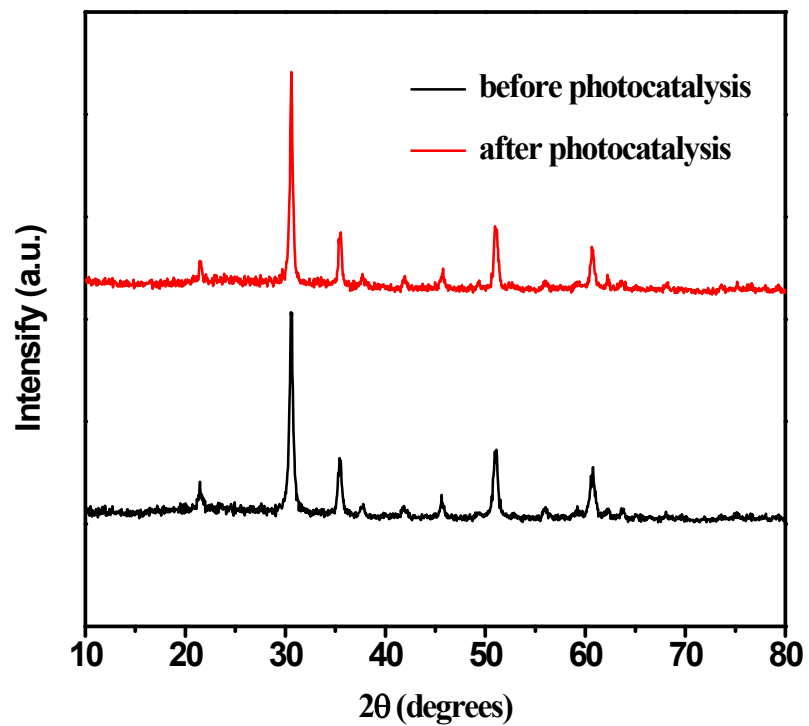

Supplement: c6ra09856h1.pdf [file c6ra09856h1.pdf]
